# Supplementary material for: Complete Genome Sequence Reveals Evolutionary and Comparative Genomic Features of Xanthomonas albilineans Causing Sugarcane Leaf Scald
Source: MDPI journal article supplement (doi:10.3390/microorganisms8020182), 2020-01-28
Supplement: s1 [file s1]

# COG function classification

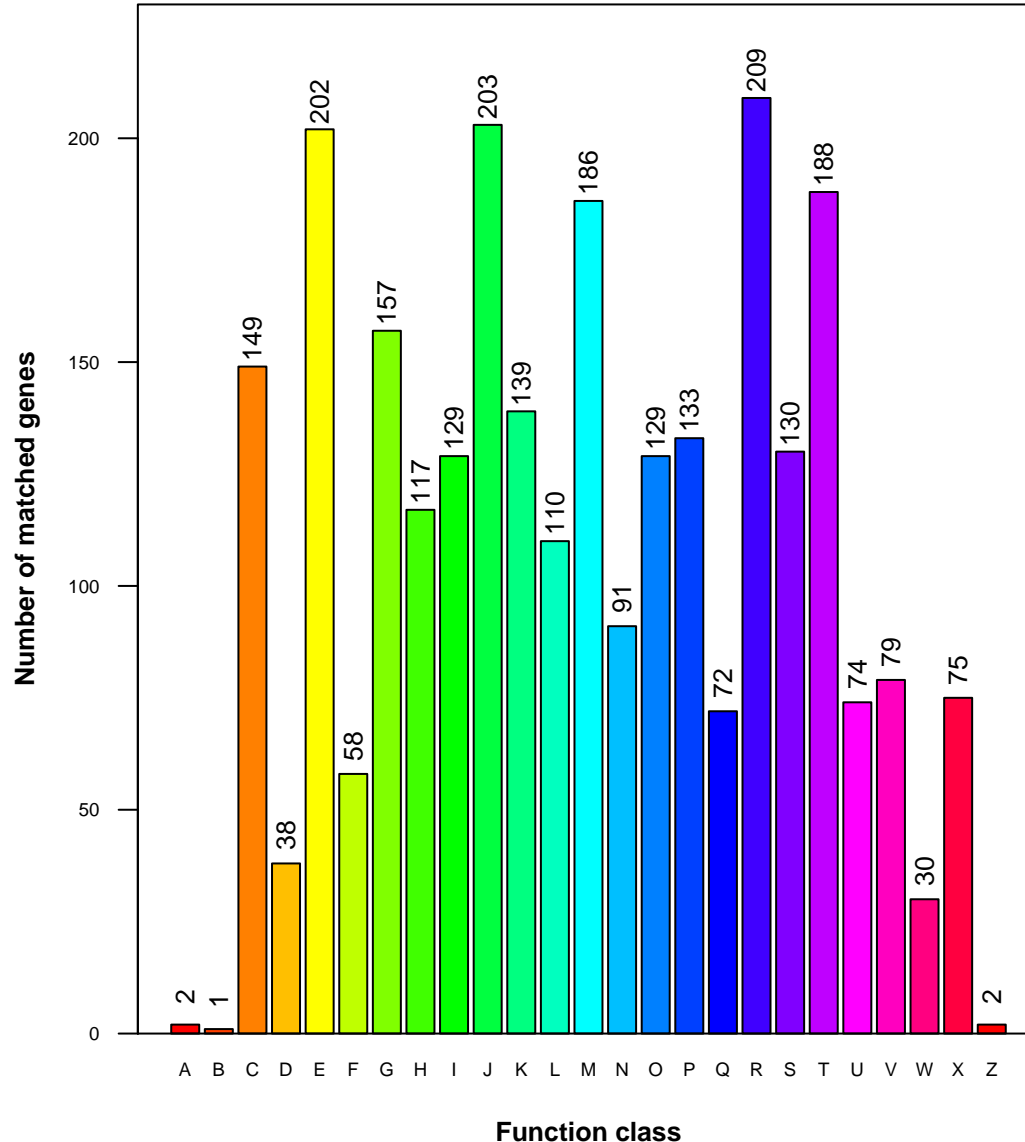

- A: RNA processing and modification (2)
- B: Chromatin structure and dynamics (1)
- C: Energy production and conversion (149)
- D: Cell cycle control, cell division, chromosome partitioning (38)
- E: Amino acid transport and metabolism (202)
- F: Nucleotide transport and metabolism (58)
- G: Carbohydrate transport and metabolism (157)
- H: Coenzyme transport and metabolism (117)
- I: Lipid transport and metabolism (129)
- J: Translation, ribosomal structure and biogenesis (203)
- K: Transcription (139)
- L: Replication, recombination and repair (110)
- M: Cell wall/membrane/envelope biogenesis (186)
- N: Cell motility (91)
- O: Posttranslational modification, protein turnover, chaperones (129)
- P: Inorganic ion transport and metabolism (133)
- Q: Secondary metabolites biosynthesis, transport and catabolism (72)
- R: General function prediction only (209)
- S: Function unknown (130)
- T: Signal transduction mechanisms (188)
- U: Intracellular trafficking, secretion, and vesicular transport (74)
- V: Defense mechanisms (79)
- W: Extracellular structures (30)
- X: Mobilome: prophages, transposons (75)
- Z: Cytoskeleton (2)
