# Supplementary material for: Complete Genome Sequence Reveals Evolutionary and Comparative Genomic Features of Xanthomonas albilineans Causing Sugarcane Leaf Scald
Source: MDPI journal article supplement (doi:10.3390/microorganisms8020182), 2020-01-28

# KEGG pathway annotation

## Cellular Processes

Transport and catabolism  
Cellular community – prokaryotes  
Cell motility  
Cell growth and death

## Environmental Information Processing

Signal transduction  
Membrane transport

## Genetic Information Processing

Translation  
Transcription  
Replication and repair  
Folding, sorting and degradation

## Human Diseases

Neurodegenerative diseases  
Infectious diseases: Viral  
Infectious diseases: Parasitic  
Infectious diseases: Bacterial  
Immune diseases  
Endocrine and metabolic diseases  
Drug resistance: Antineoplastic  
Drug resistance: Antimicrobial  
Cardiovascular diseases  
Cancers: Specific types  
Cancers: Overview

## Metabolism

Xenobiotics biodegradation and metabolism  
Nucleotide metabolism  
Metabolism of terpenoids and polyketides  
Metabolism of other amino acids  
Metabolism of cofactors and vitamins  
Lipid metabolism  
Glycan biosynthesis and metabolism  
Global and overview maps  
Energy metabolism  
Carbohydrate metabolism  
Biosynthesis of other secondary metabolites  
Amino acid metabolism

## Organismal Systems

Nervous system  
Immune system  
Environmental adaptation  
Endocrine system  
Digestive system  
Circulatory system  
Aging

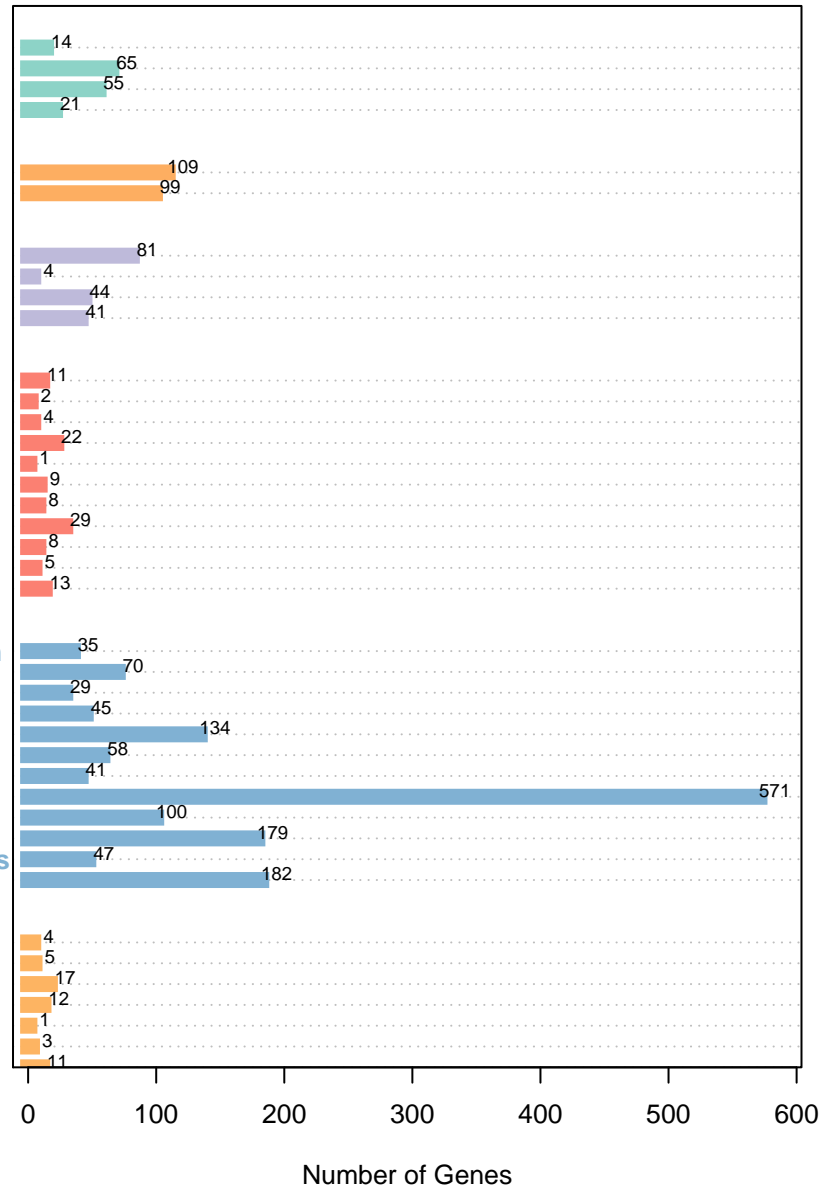

Supplement: s1 [file s1]
