# Supplementary material for: Complete Genome Sequence Reveals Evolutionary and Comparative Genomic Features of Xanthomonas albilineans Causing Sugarcane Leaf Scald
Source: MDPI journal article supplement (doi:10.3390/microorganisms8020182), 2020-01-28
Supplement: s1 [file s1]

A

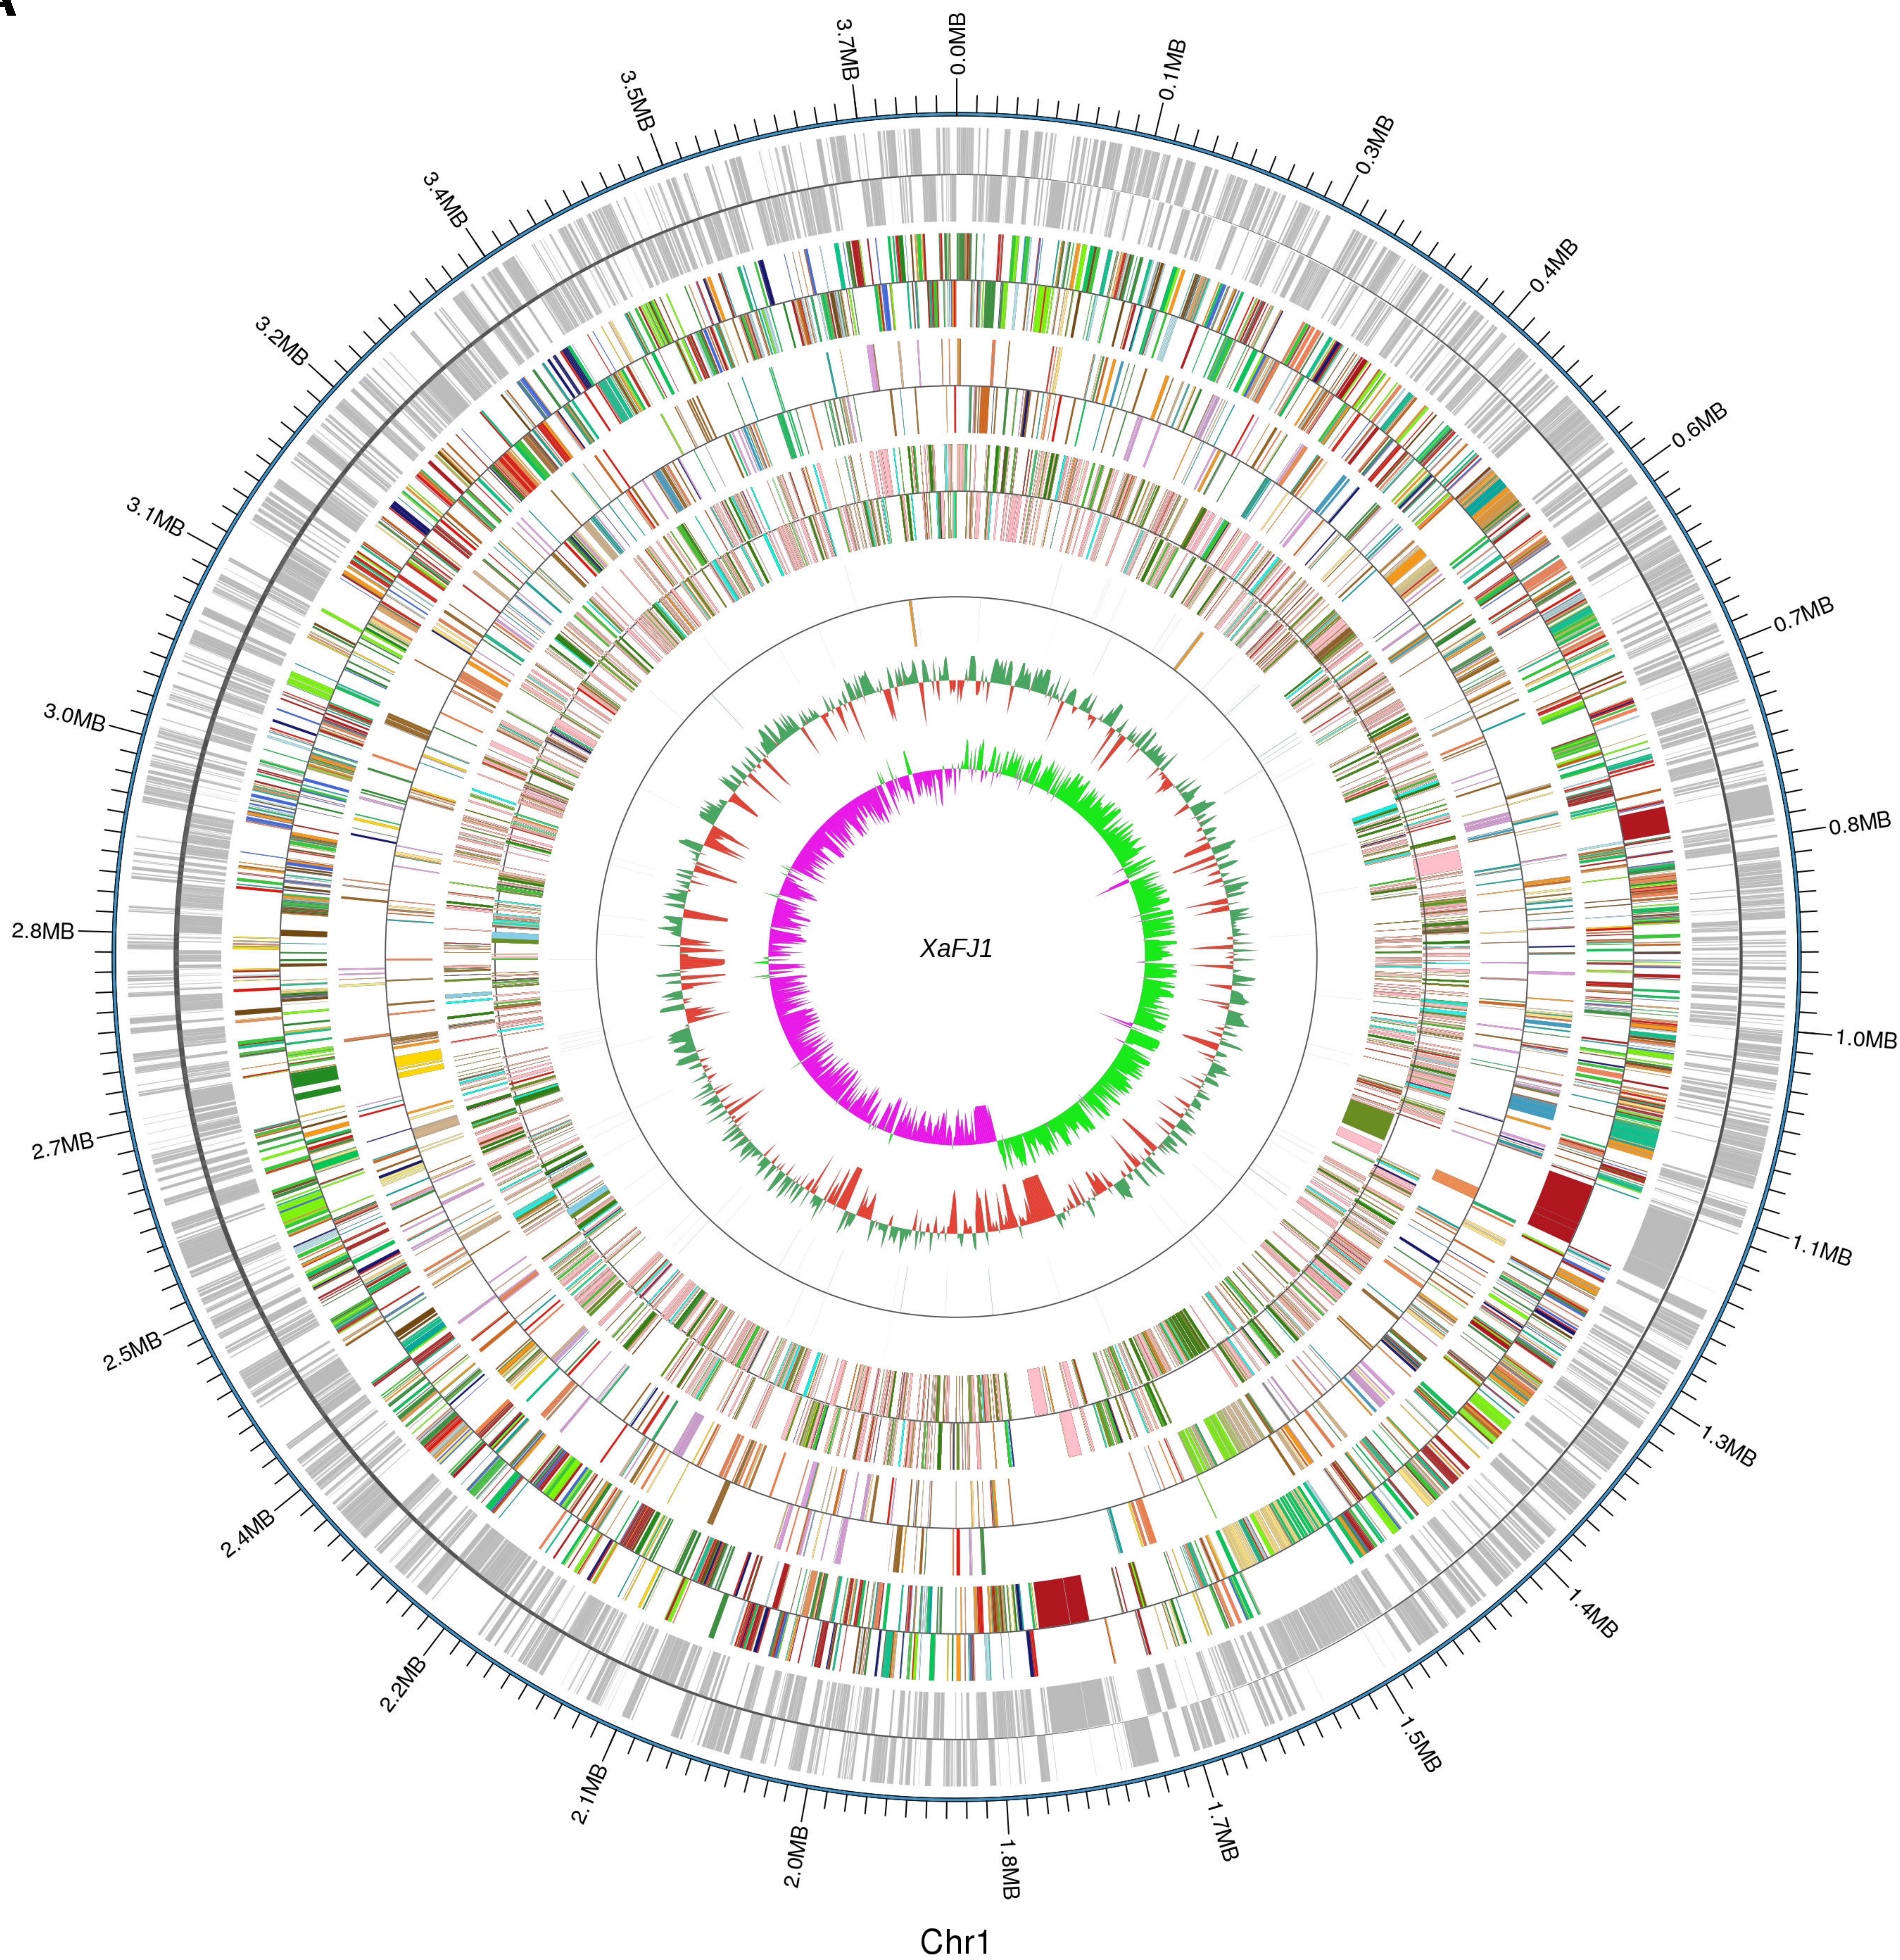



**B**

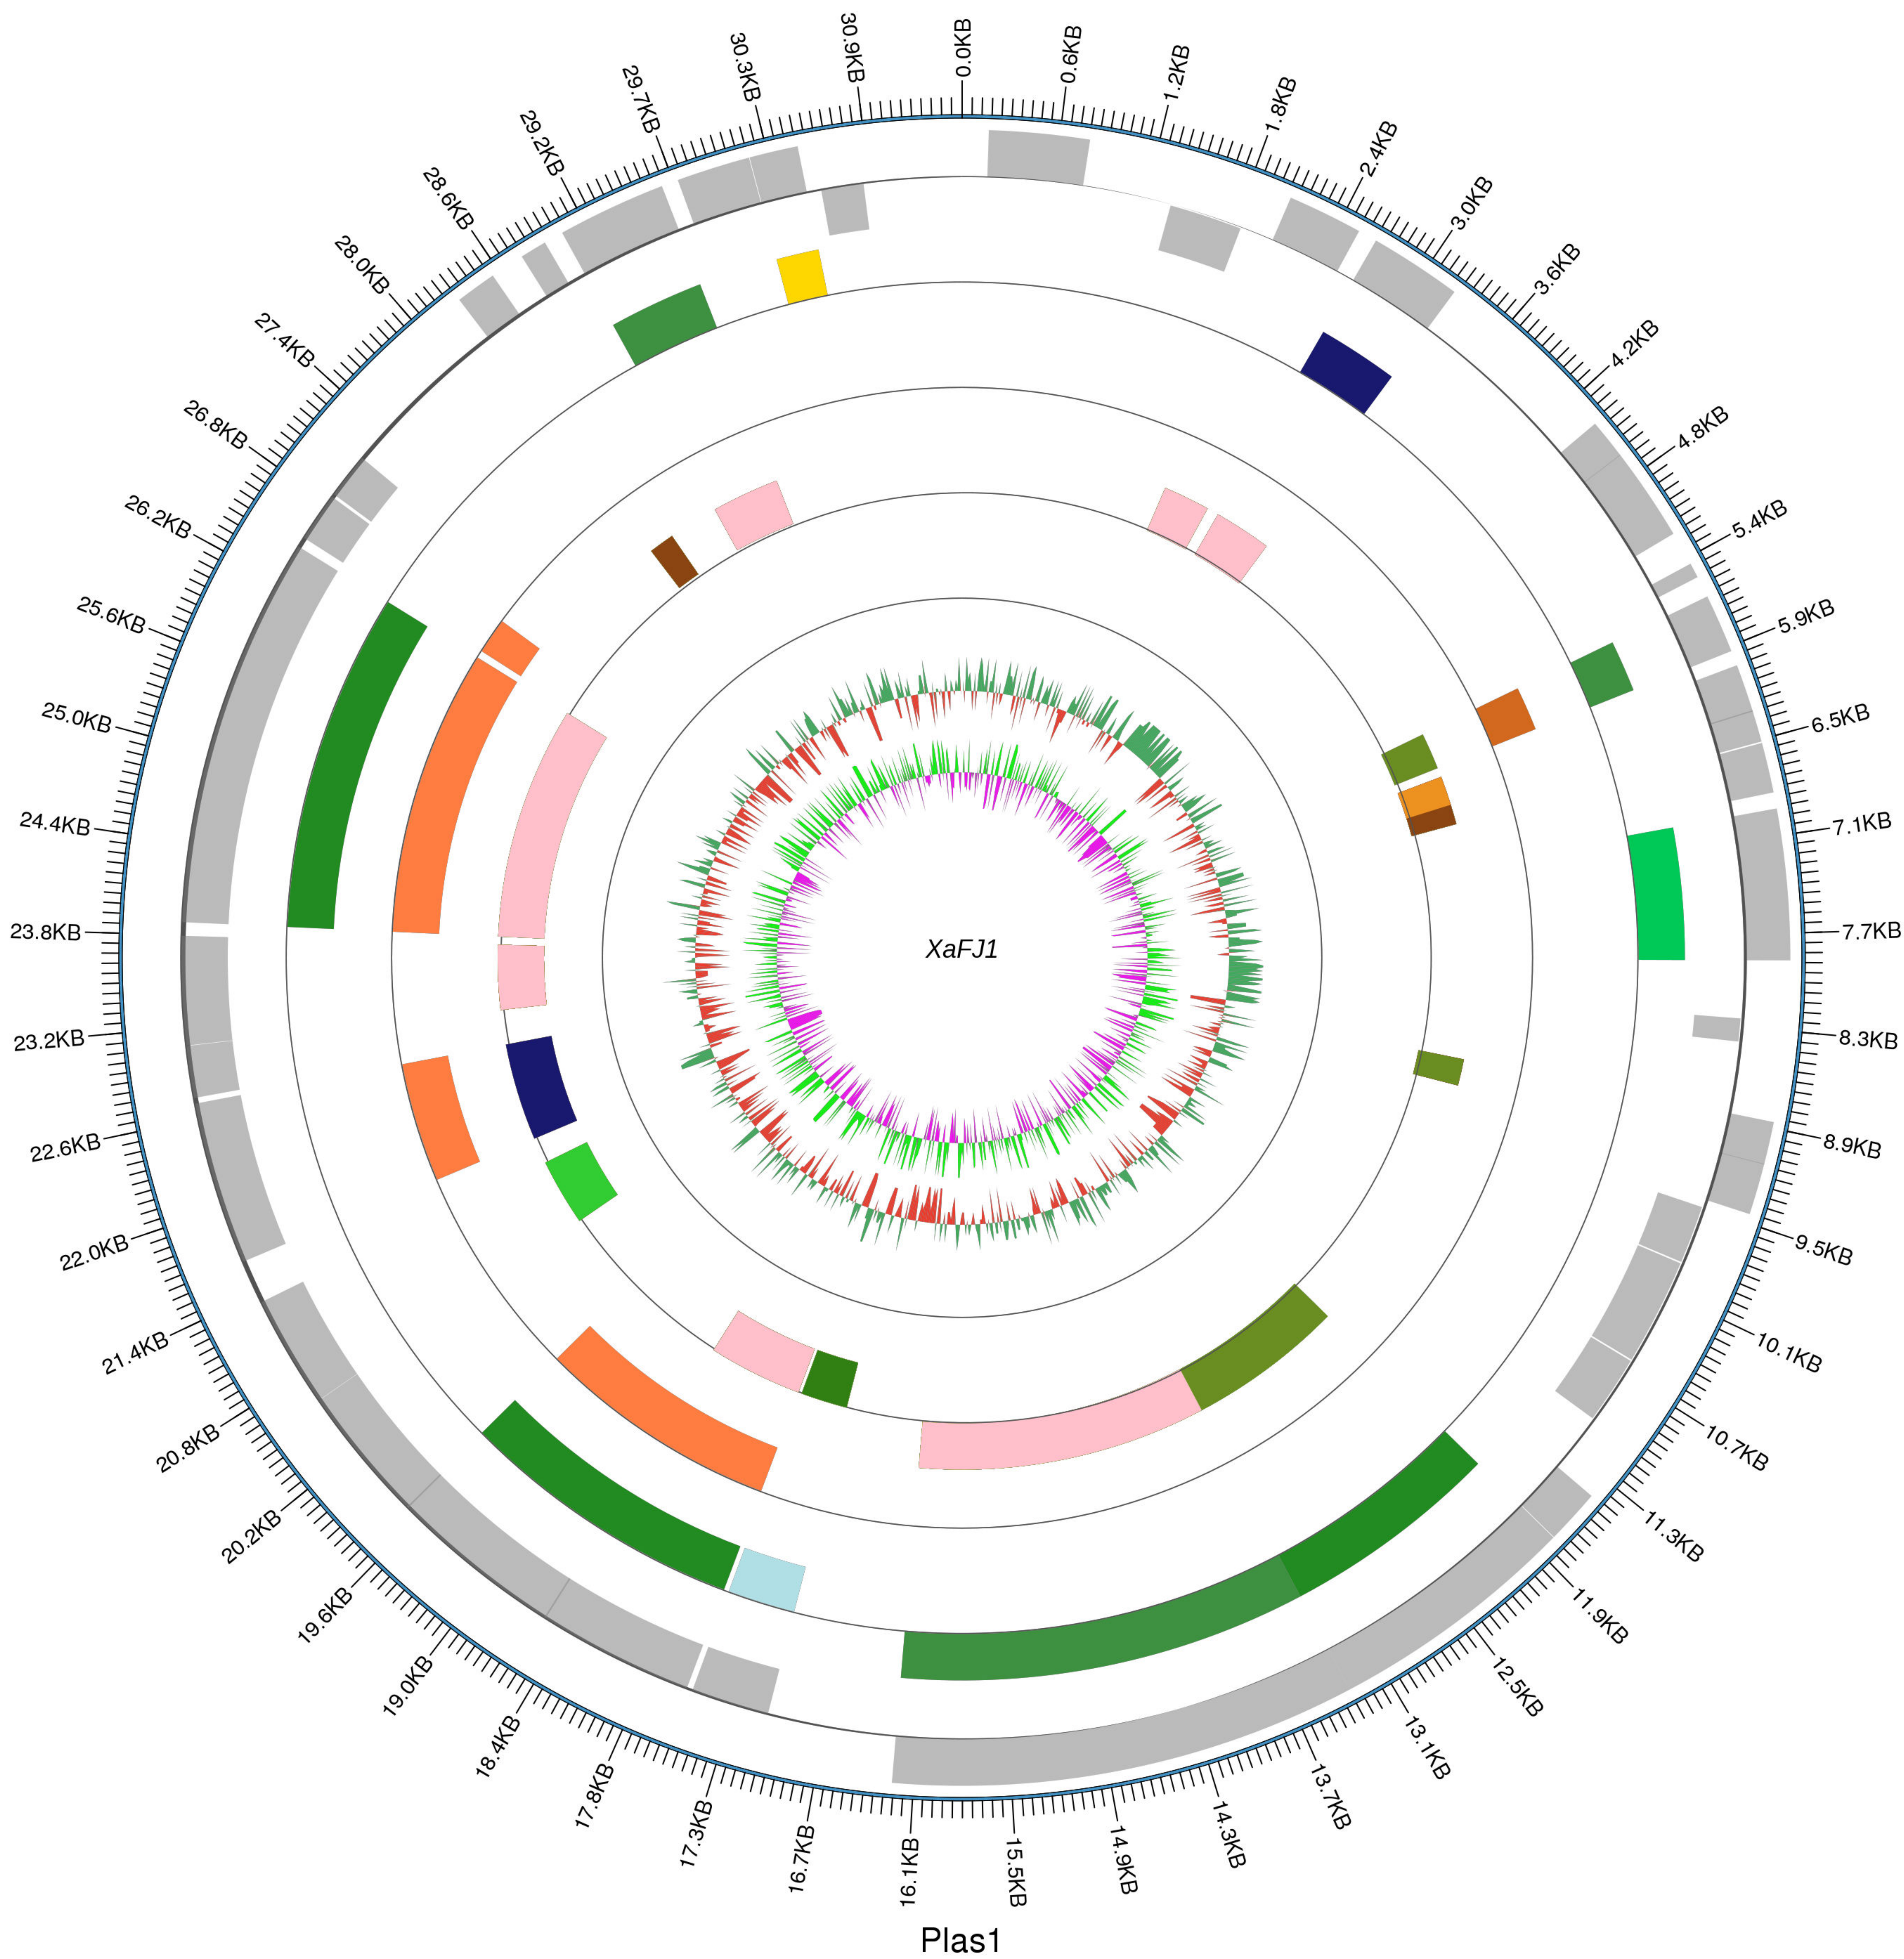



INFORMATION STORAGE AND PROCESSING

- J: Translation, ribosomal structure and biogenesis
- A: RNA processing and modification
- K: Transcription
- L: Replication, recombination and repair
- B: Chromatin structure and dynamics

CELLULAR PROCESSES AND SIGNALING

- D: Cell cycle control, cell division, chromosome partitioning
- V: Defense mechanisms
- T: Signal transduction mechanisms
- M: Cell wall/membrane/envelope biogenesis
- N: Cell motility
- Z: Cytoskeleton
- W: Extracellular structures
- U: Intracellular trafficking, secretion, and vesicular transport
- O: Posttranslational modification, protein turnover, chaperones
- X: Mobilome: prophages, transposons

METABOLISM

- C: Energy production and conversion
- G: Carbohydrate transport and metabolism
- E: Amino acid transport and metabolism
- F: Nucleotide transport and metabolism
- H: Coenzyme transport and metabolism
- I: Lipid transport and metabolism
- P: Inorganic ion transport and metabolism
- Q: Secondary metabolites biosynthesis, transport and catabolism

POORLY CHARACTERIZED

- R: General function prediction only
- S: Function unknown

- Cellular Processes -- Cell growth and death
- Cellular Processes -- Cell motility
- Cellular Processes -- Transport and catabolism
- Environmental Information Processing -- Membrane transport
- Environmental Information Processing -- Signal transduction
- Genetic Information Processing -- Folding, sorting and degradation
- Genetic Information Processing -- Replication and repair
- Genetic Information Processing -- Translation
- Human Diseases -- Cancers
- Human Diseases -- Drug resistance
- Human Diseases -- Infectious diseases
- Metabolism -- Amino acid metabolism
- Metabolism -- Biosynthesis of other secondary metabolites
- Metabolism -- Carbohydrate metabolism
- Metabolism -- Energy metabolism
- Metabolism -- Glycan biosynthesis and metabolism
- Metabolism -- Lipid metabolism
- Metabolism -- Metabolism of cofactors and vitamins
- Metabolism -- Metabolism of other amino acids
- Metabolism -- Metabolism of terpenoids and polyketides
- Metabolism -- Nucleotide metabolism
- Metabolism -- Xenobiotics biodegradation and metabolism
- Organismal Systems -- Digestive system
- Organismal Systems -- Endocrine system

- biological\_process -- biological adhesion
- biological\_process -- biological regulation
- biological\_process -- cell killing
- biological\_process -- cellular component organization or biogenesis
- biological\_process -- cellular process
- biological\_process -- death
- biological\_process -- developmental process
- biological\_process -- establishment of localization
- biological\_process -- immune system process
- biological\_process -- localization
- biological\_process -- locomotion
- biological\_process -- metabolic process
- biological\_process -- multi-organism process
- biological\_process -- multicellular organismal process
- biological\_process -- negative regulation of biological process
- biological\_process -- nitrogen utilization
- biological\_process -- positive regulation of biological process
- biological\_process -- regulation of biological process
- biological\_process -- reproduction
- biological\_process -- reproductive process
- biological\_process -- response to stimulus
- biological\_process -- signaling
- biological\_process -- viral reproduction
- cellular\_component -- cell
- cellular\_component -- cell junction
- cellular\_component -- cell part
- cellular\_component -- extracellular region
- cellular\_component -- extracellular region part
- cellular\_component -- macromolecular complex
- cellular\_component -- membrane-enclosed lumen
- cellular\_component -- organelle
- cellular\_component -- organelle part
- cellular\_component -- virion
- cellular\_component -- virion part
- molecular\_function -- antioxidant activity
- molecular\_function -- binding
- molecular\_function -- catalytic activity
- molecular\_function -- channel regulator activity
- molecular\_function -- electron carrier activity
- molecular\_function -- enzyme regulator activity
- molecular\_function -- molecular transducer activity
- molecular\_function -- nucleic acid binding transcription factor activity
- molecular\_function -- protein binding transcription factor activity
- molecular\_function -- structural molecule activity
- molecular\_function -- transporter activity

- 16s\_rRNA
- 23s\_rRNA
- 5s\_rRNA
- sRNA
- tRNA
