# Supplementary figures and images for: Complete Genome Sequence Reveals Evolutionary and Comparative Genomic Features of Xanthomonas albilineans Causing Sugarcane Leaf Scald
Source: MDPI journal article supplement (doi:10.3390/microorganisms8020182), 2020-01-28

## CRISPR-1 spacer distribution

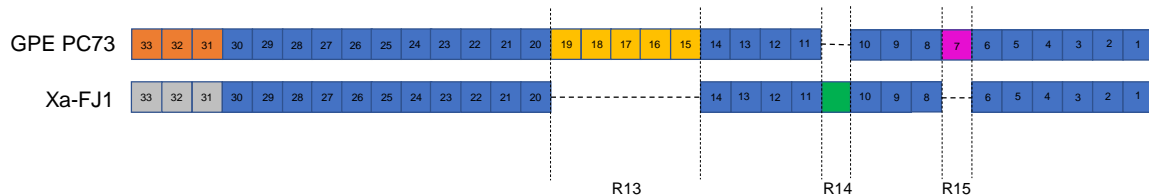

## CRISPR-2 spacer distribution

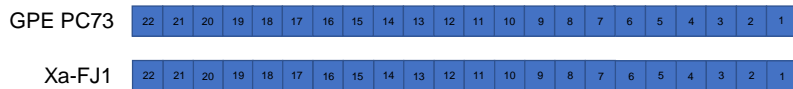

Supplement: s1 [file s1]

# Go Standard

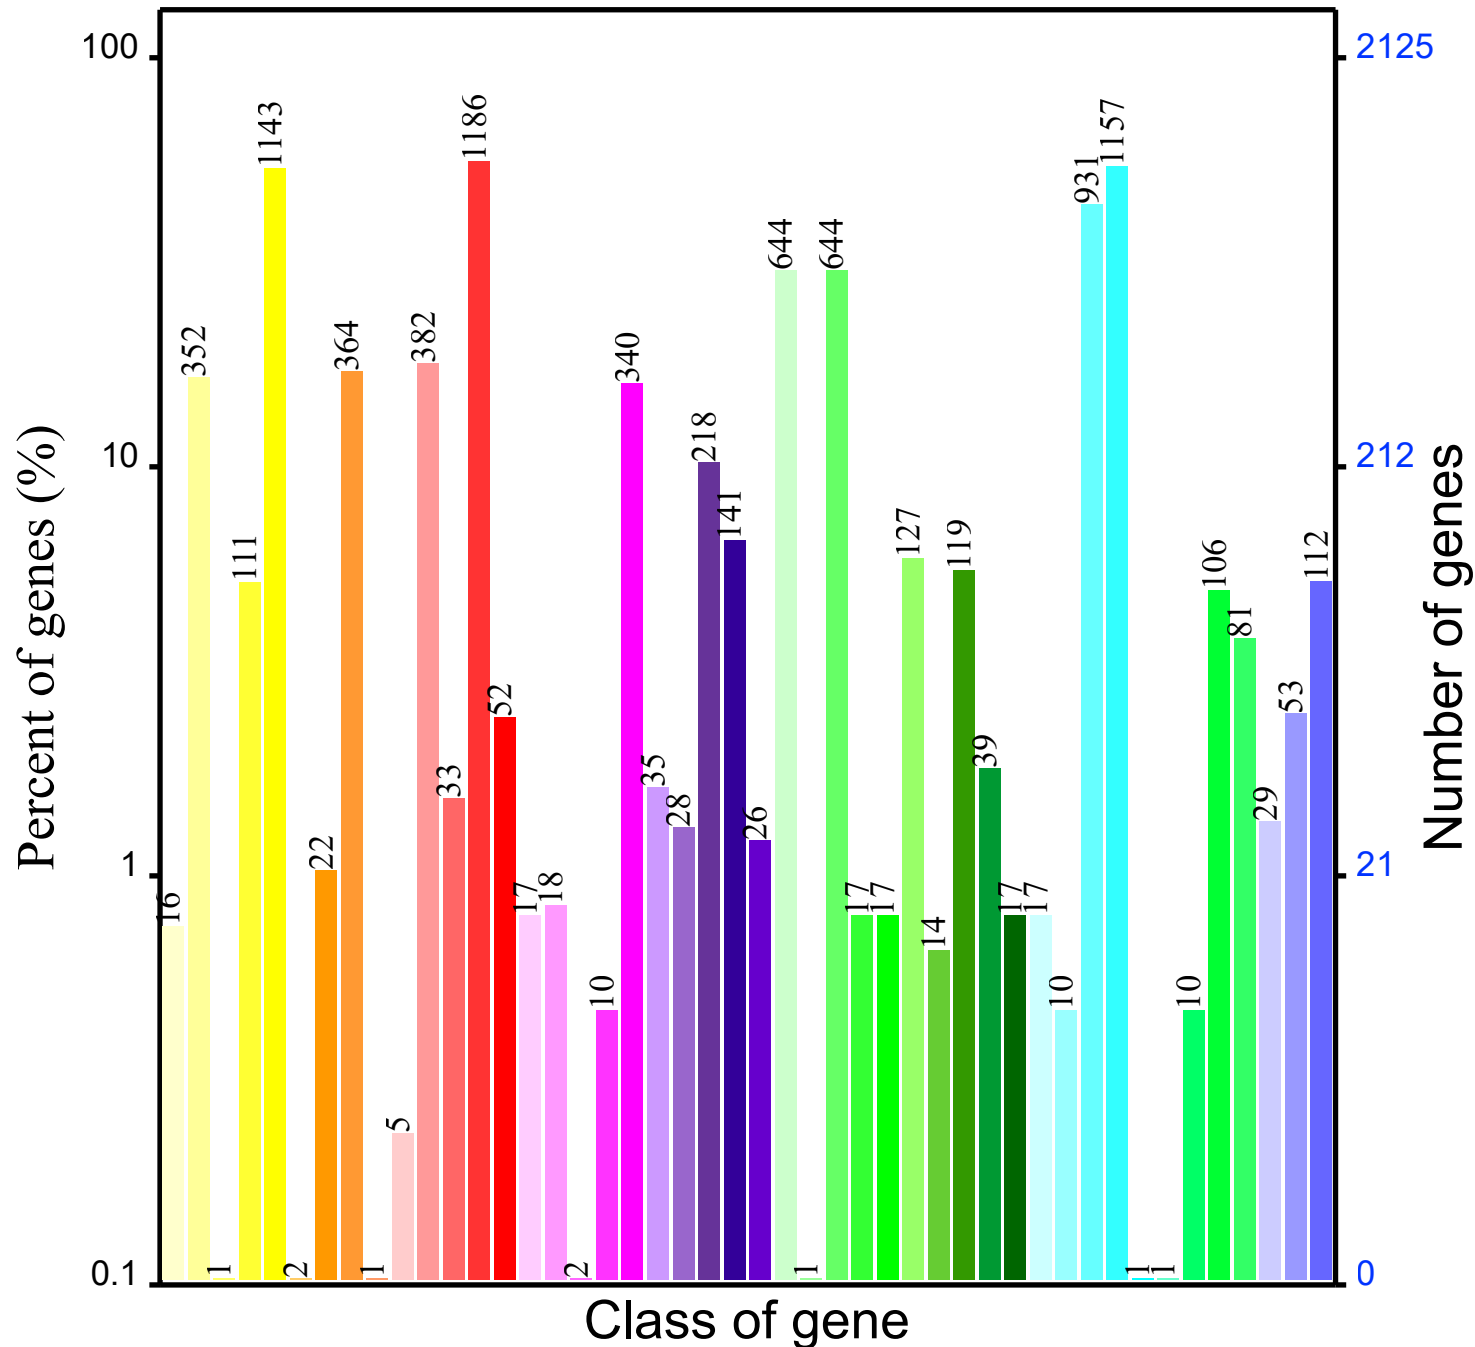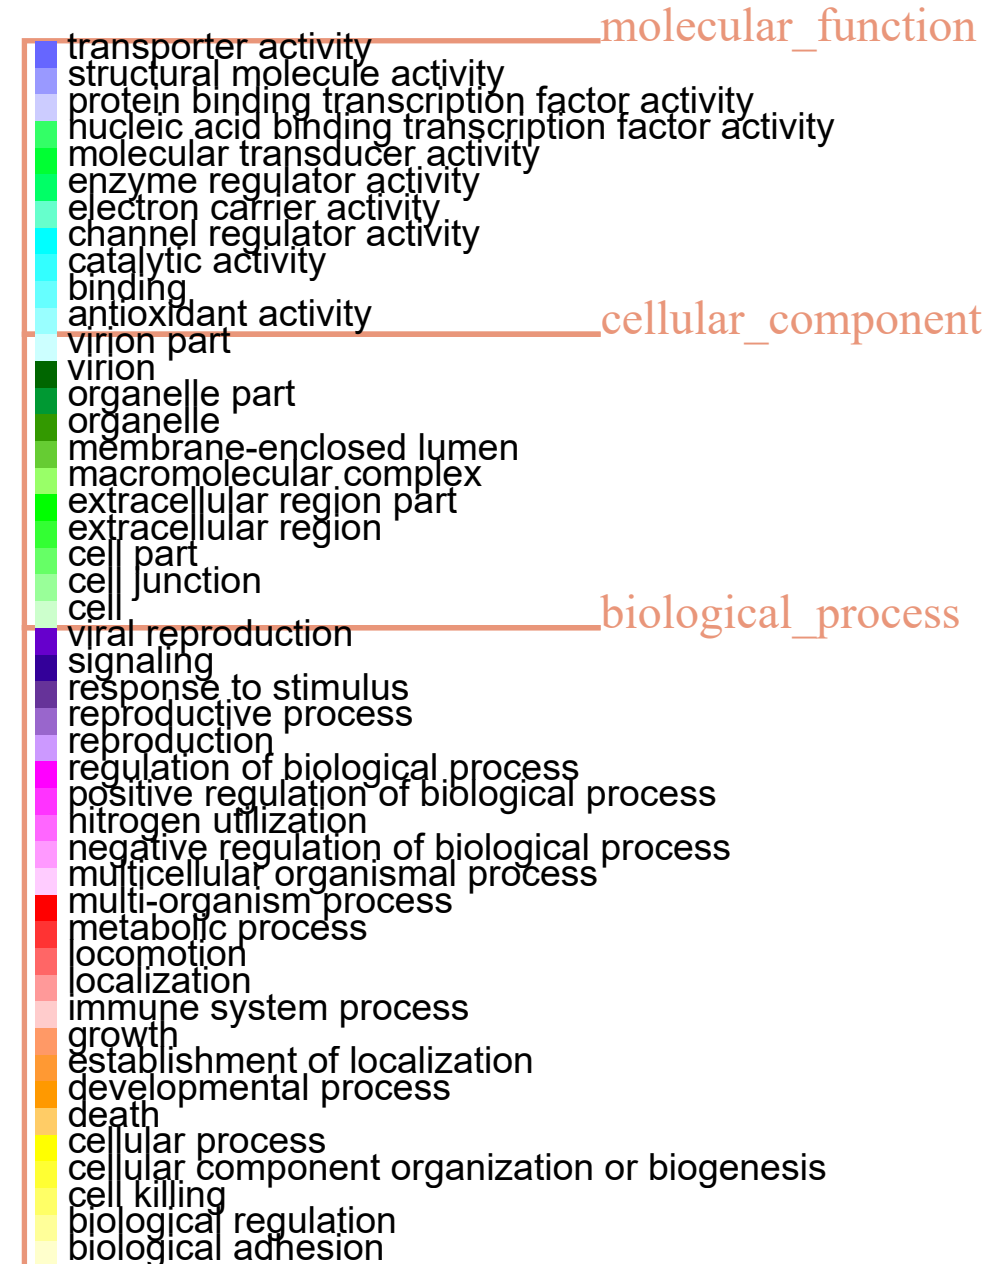

Supplement: s1 [file s1]
